# Supplementary figures and images for: Adenine methylation is very scarce in the Drosophila genome and not erased by the ten-eleven translocation dioxygenase
Source: eLife journal article supplement (doi:10.7554/elife.91655), 2023-10-30

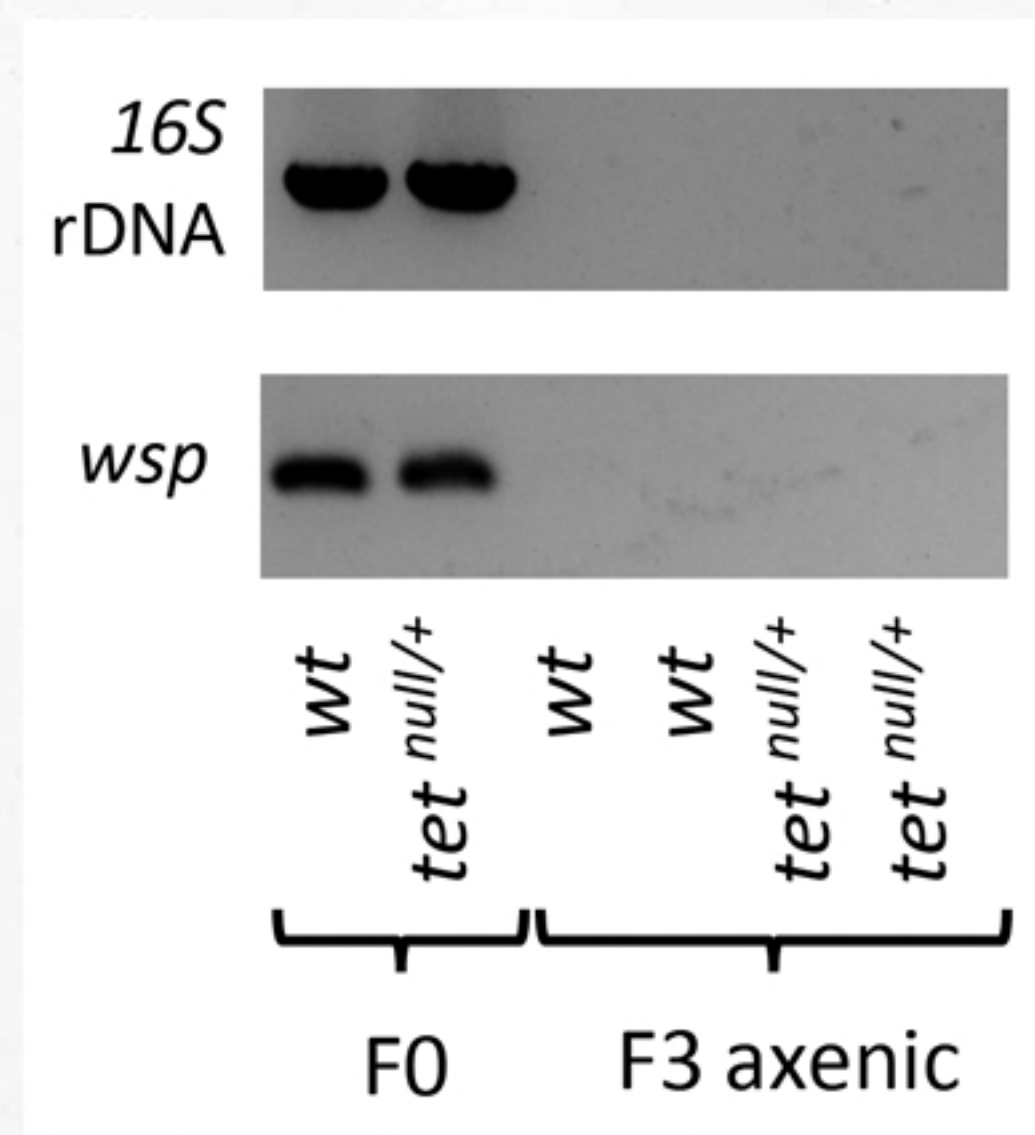

Lon

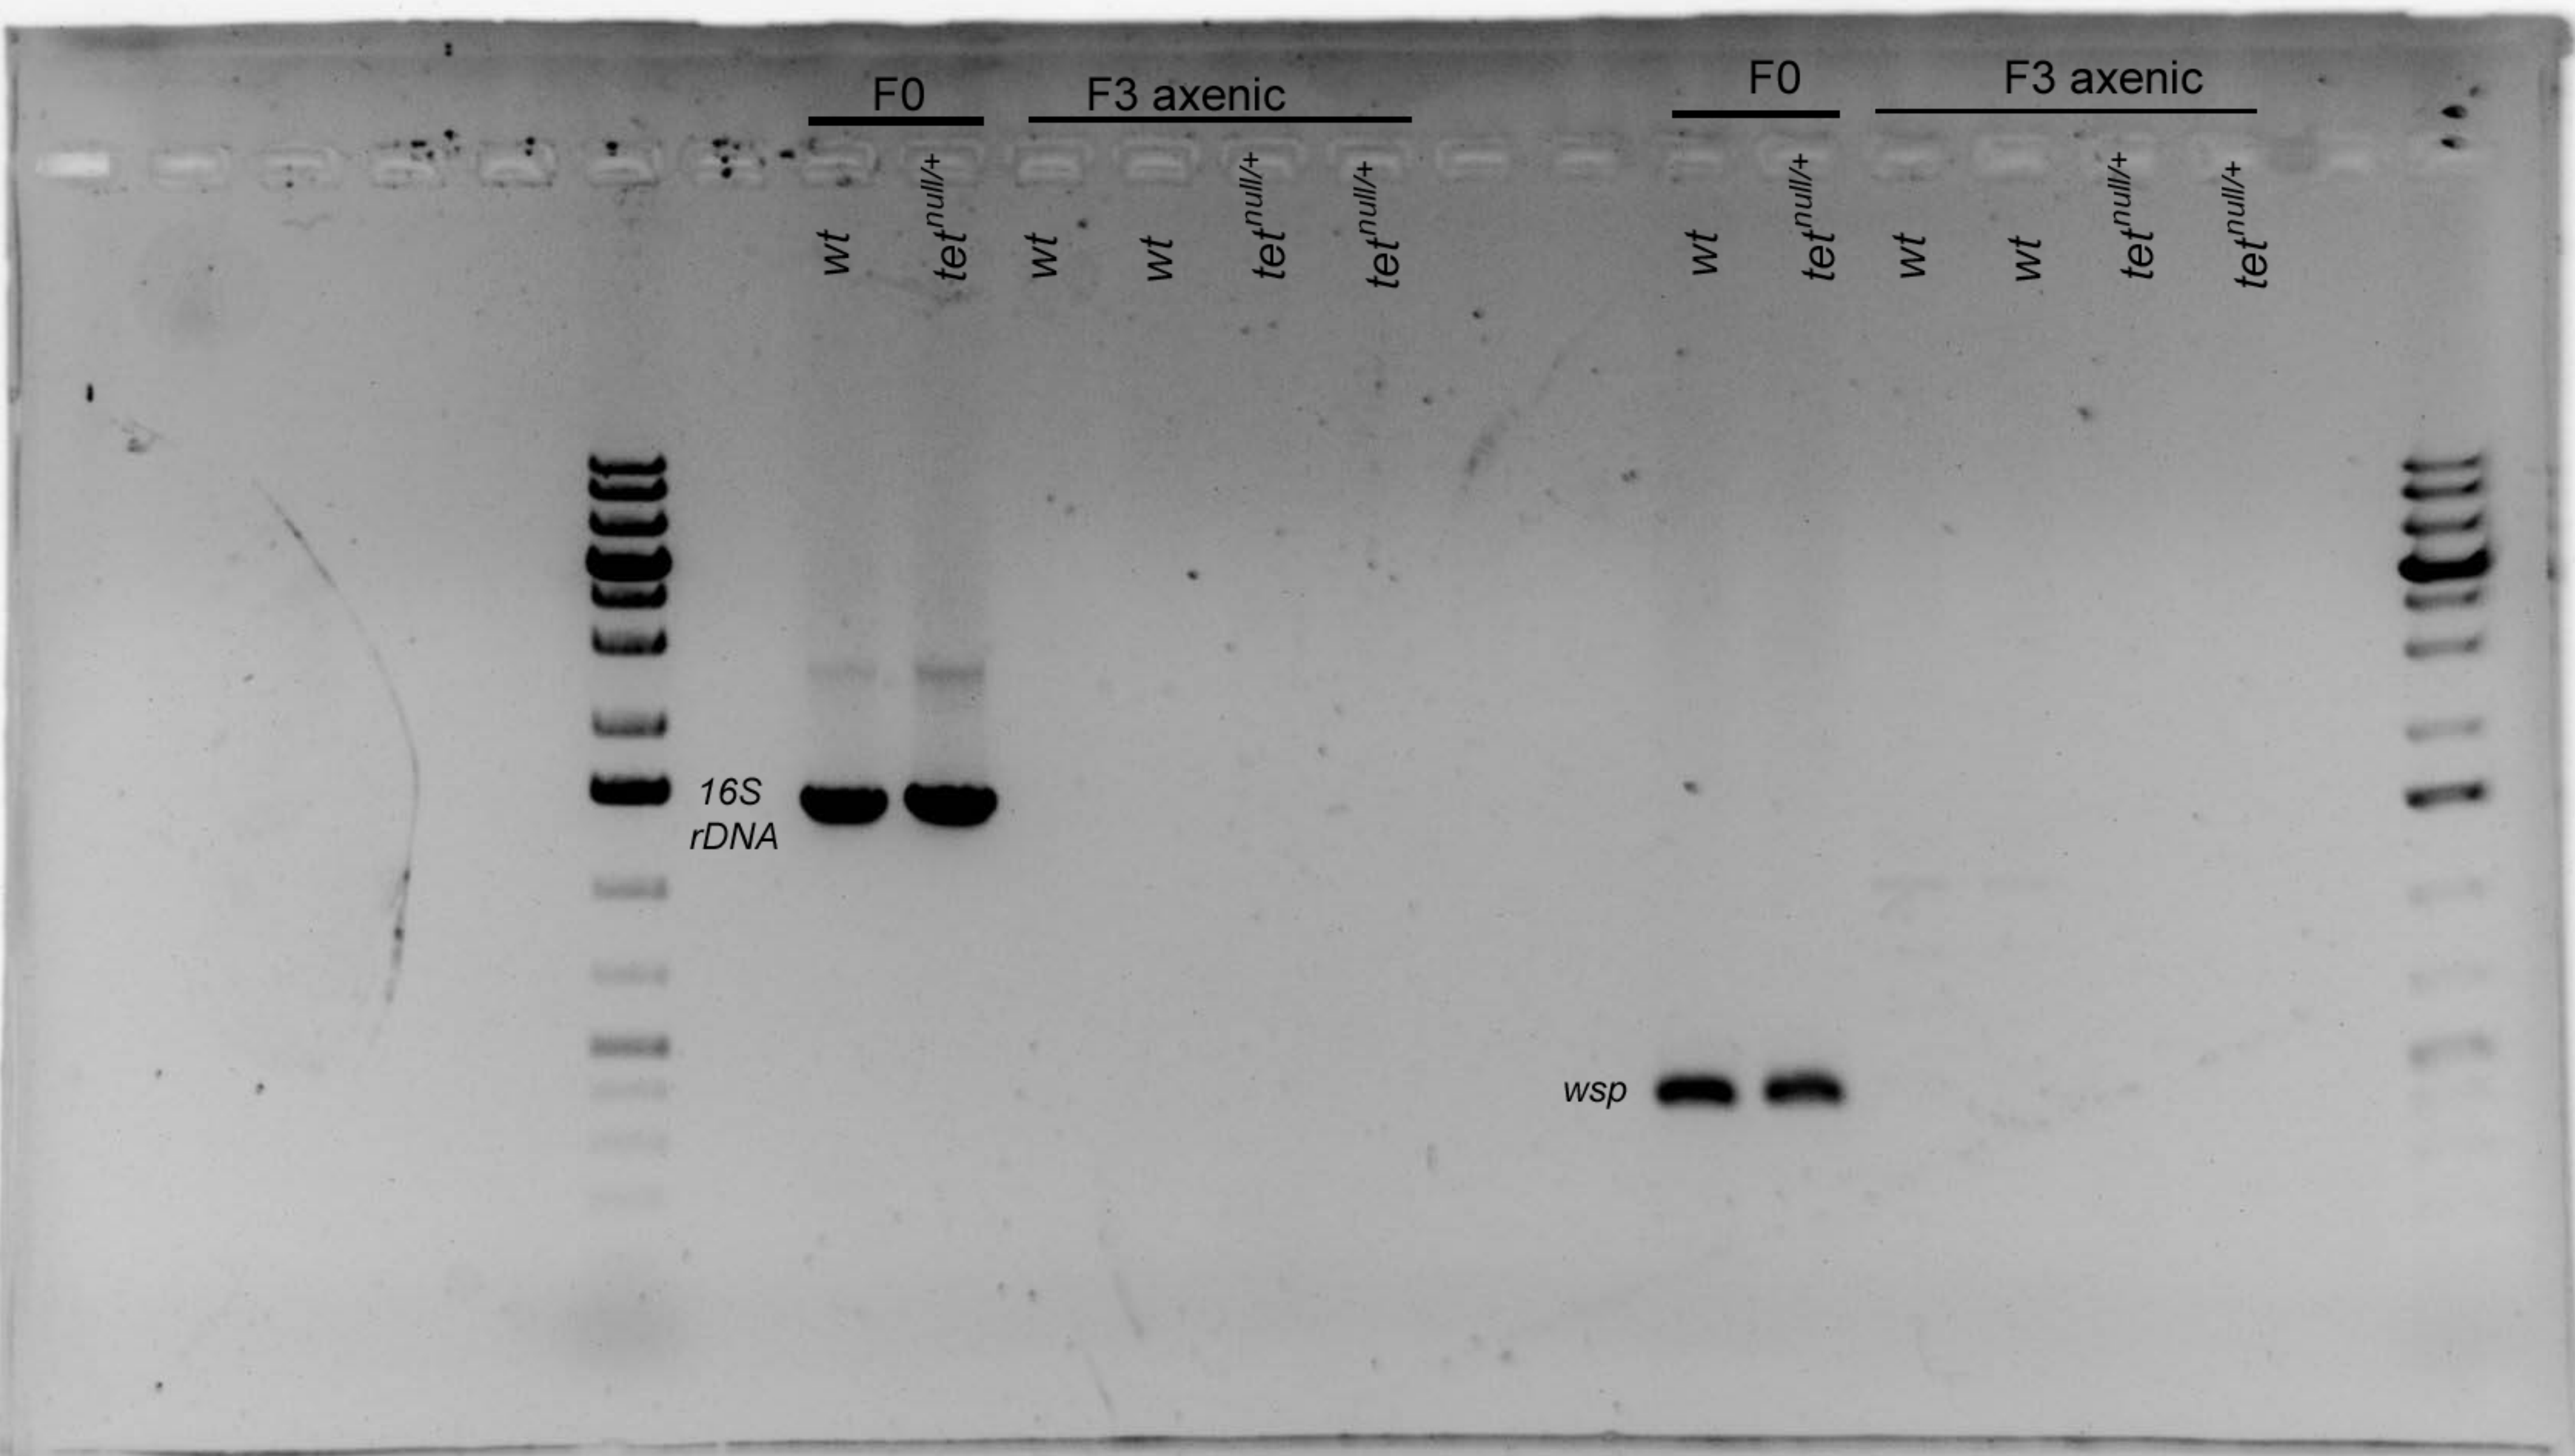

Supplement: fig1-data2 [file elife-91655-fig1-data2-v1.zip]

a

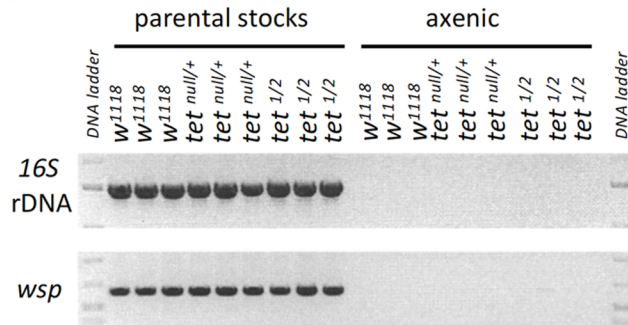

16S rDNA

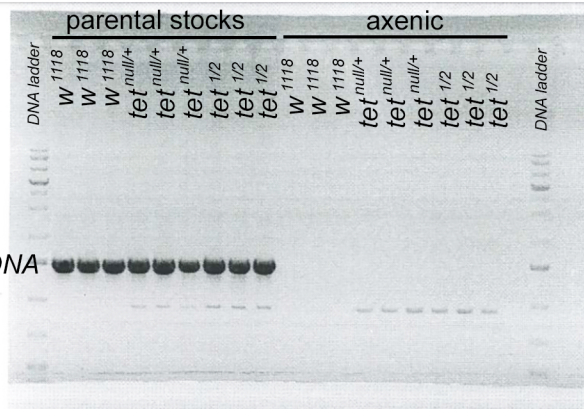*wsp*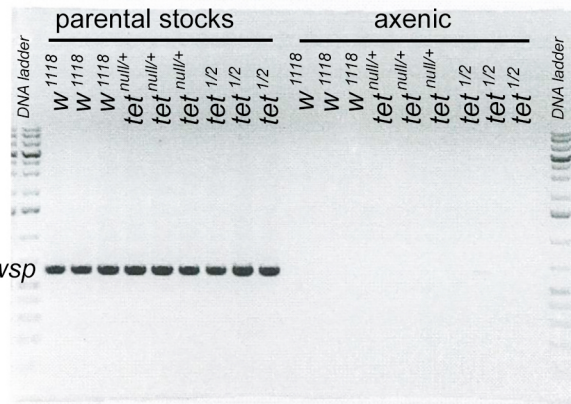

Supplement: fig1-figsupp1-data2 [file elife-91655-fig1-figsupp1-data2-v1.zip]
